# Supplementary material
Source: ML conference proceedings conference paper supplement (https://www.ecva.net/papers/eccv_2020/papers_ECCV/html/123530103_ECCV_2020_paper.php)
Supplement: Supplementary file 5 [file 123530103-supp.zip]

Archive with 17 entries (14 files):
- 0471-supp/
- 0471-supp/0471-supp.pdf
- 0471-supp/latex/
- 0471-supp/latex/.DS_Store
- 0471-supp/latex/0471-supp.pdf
- 0471-supp/latex/0471-supp.tex
- 0471-supp/latex/README.txt
- 0471-supp/latex/comment.sty
- 0471-supp/latex/egbib.bib
- 0471-supp/latex/figures/
- 0471-supp/latex/figures/Figure5_extend.pdf
- 0471-supp/latex/figures/annotation.pdf
- 0471-supp/latex/figures/detection.pdf
- 0471-supp/latex/history.txt
- 0471-supp/latex/llncs.cls
- 0471-supp/latex/ruler.sty
- 0471-supp/latex/splncs04.bst
