# Supplementary material
Source: ML conference proceedings conference paper supplement (https://www.ecva.net/papers/eccv_2020/papers_ECCV/html/123530103_ECCV_2020_paper.php)

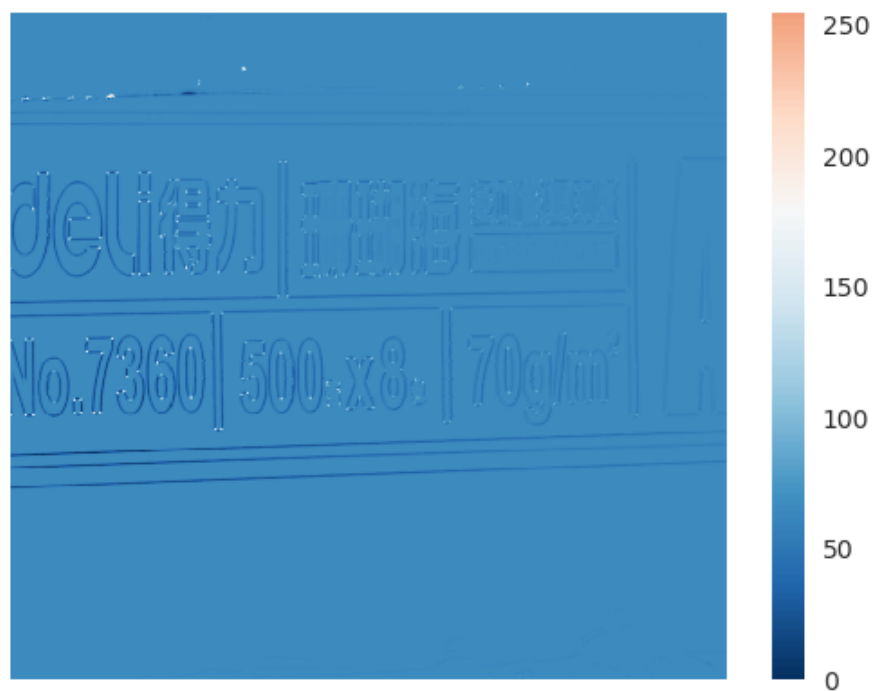

Response map of Harris corner point detection

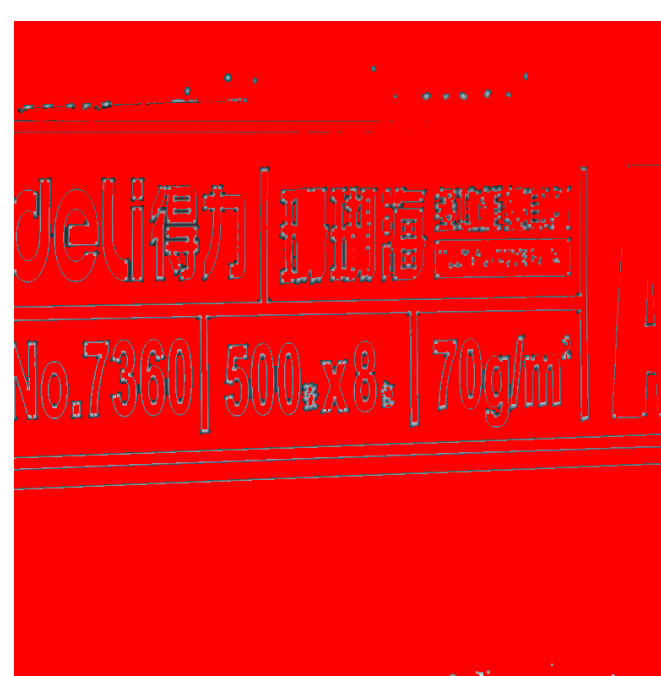

Flat

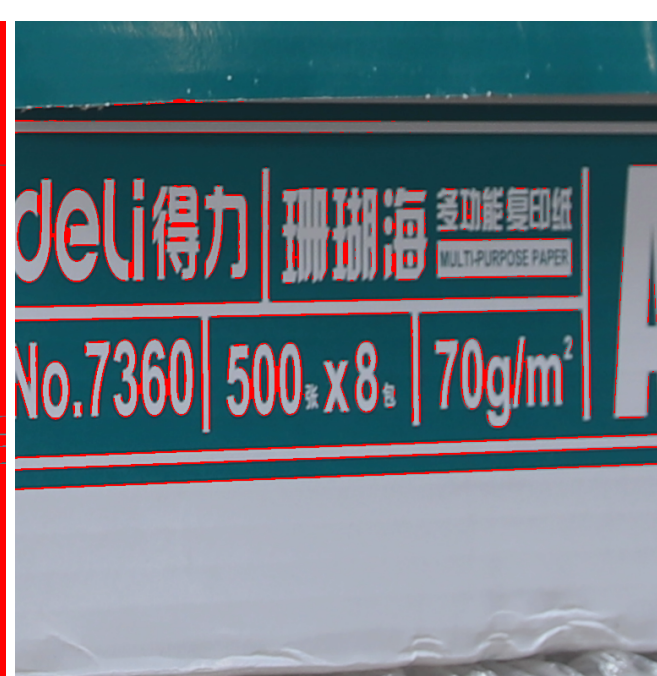

Edge

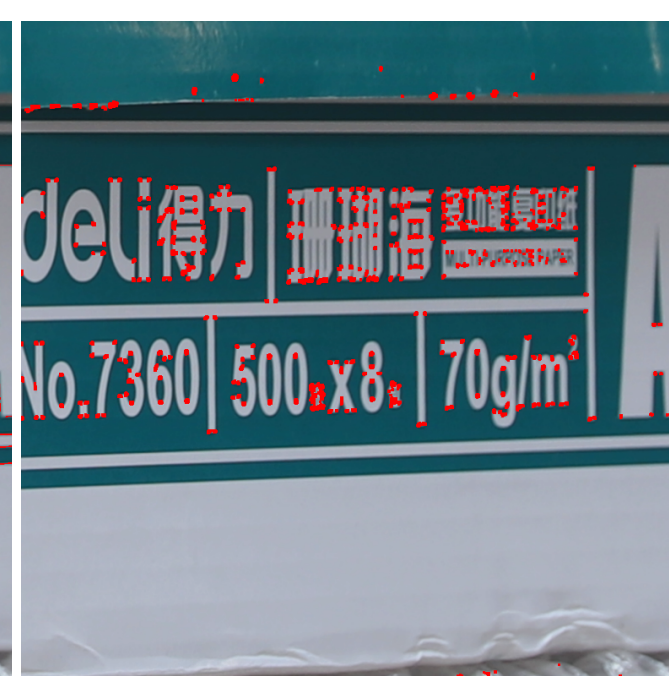

Corner point

Supplement: Supplementary file 1 [file 123530103-supp.zip]

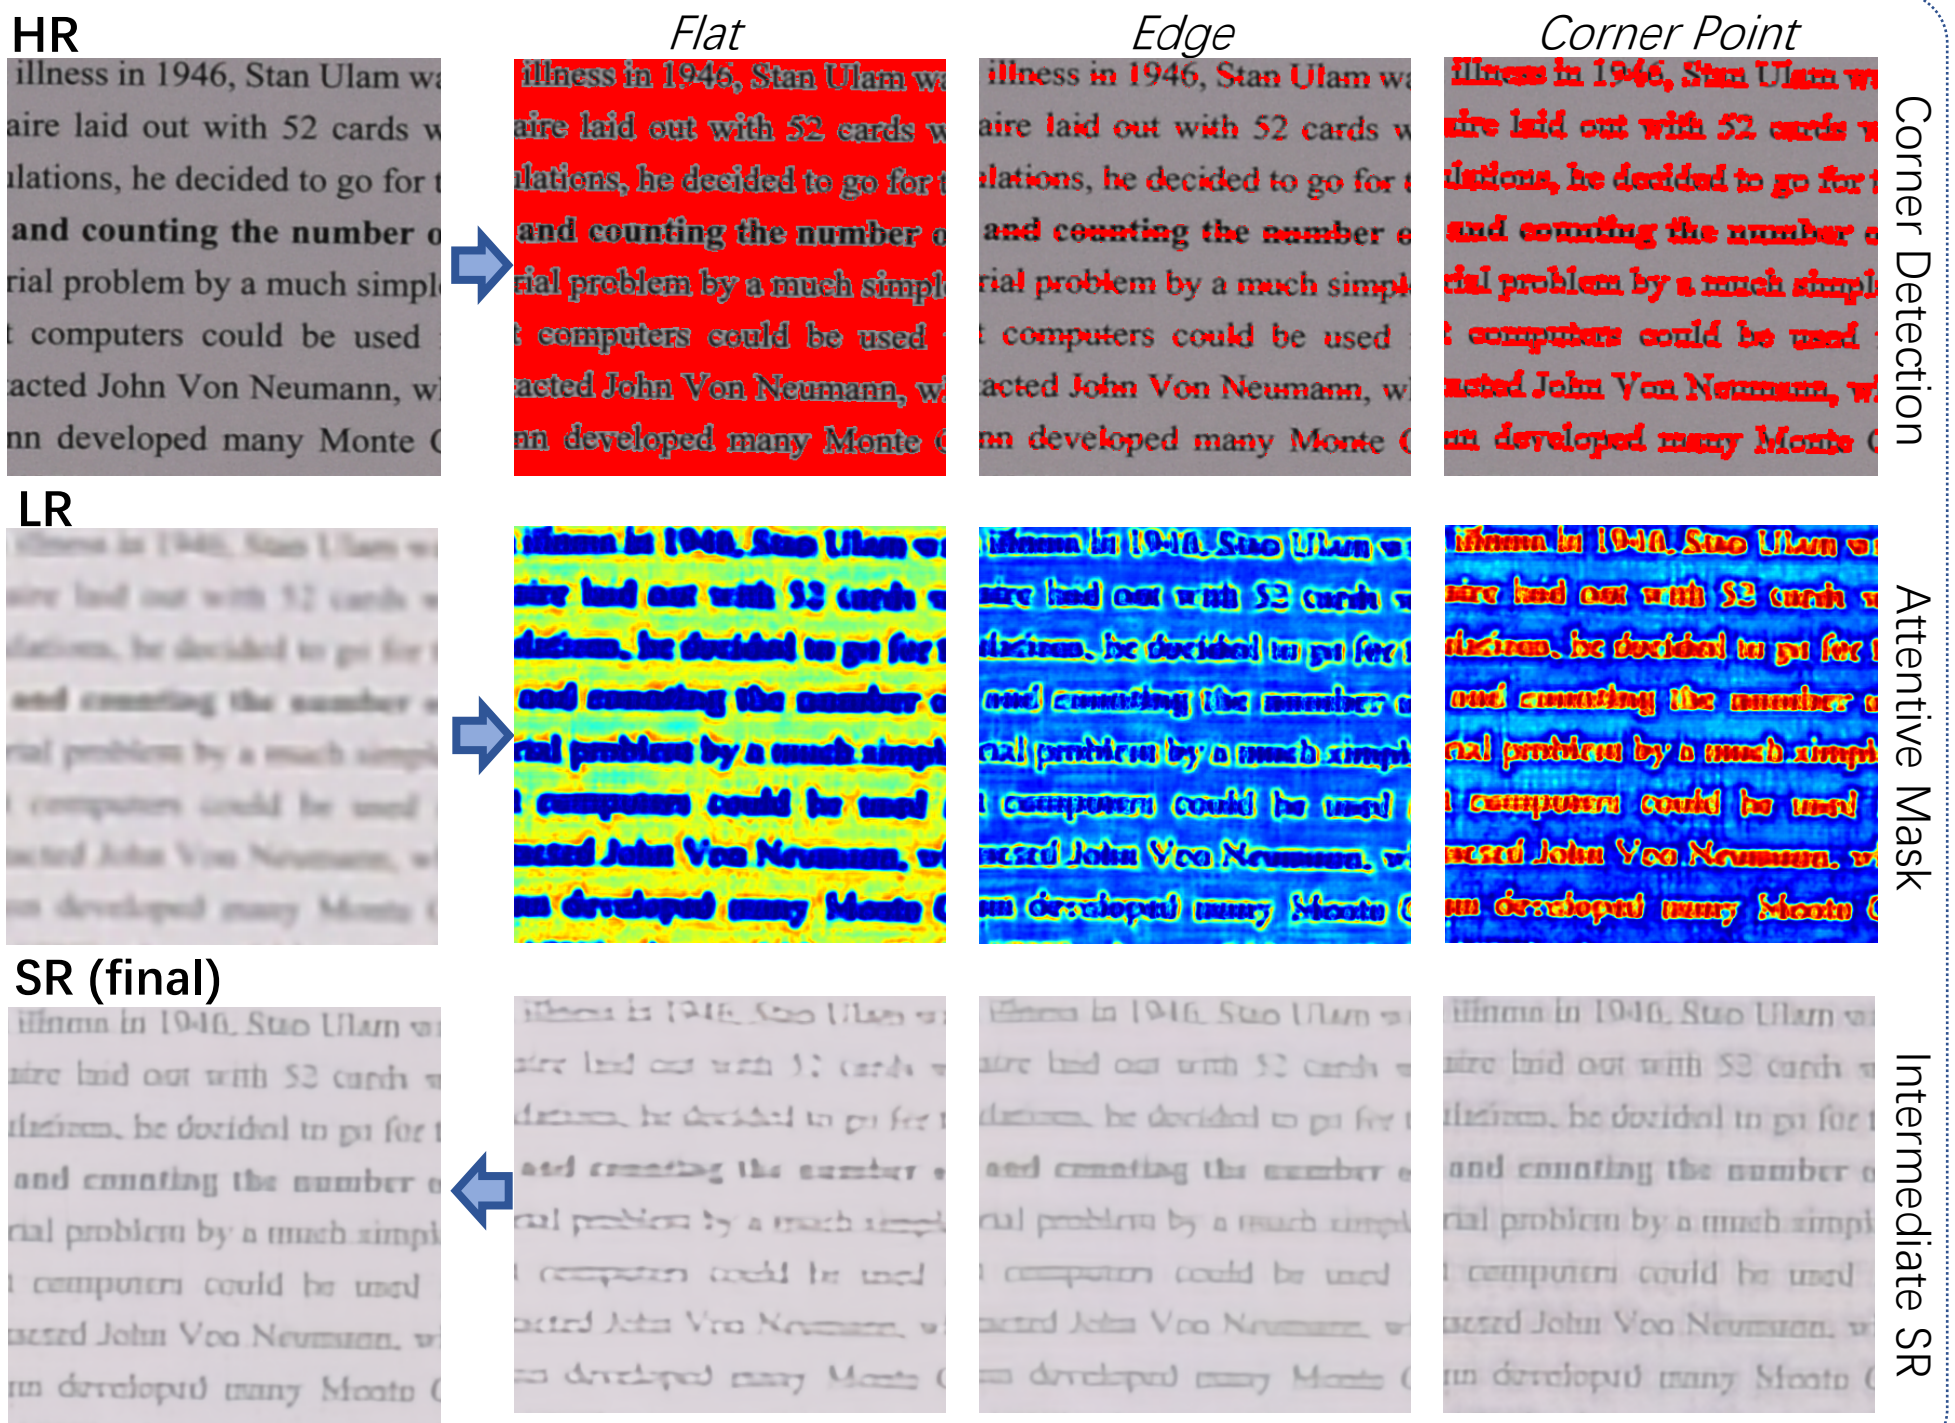

(a)

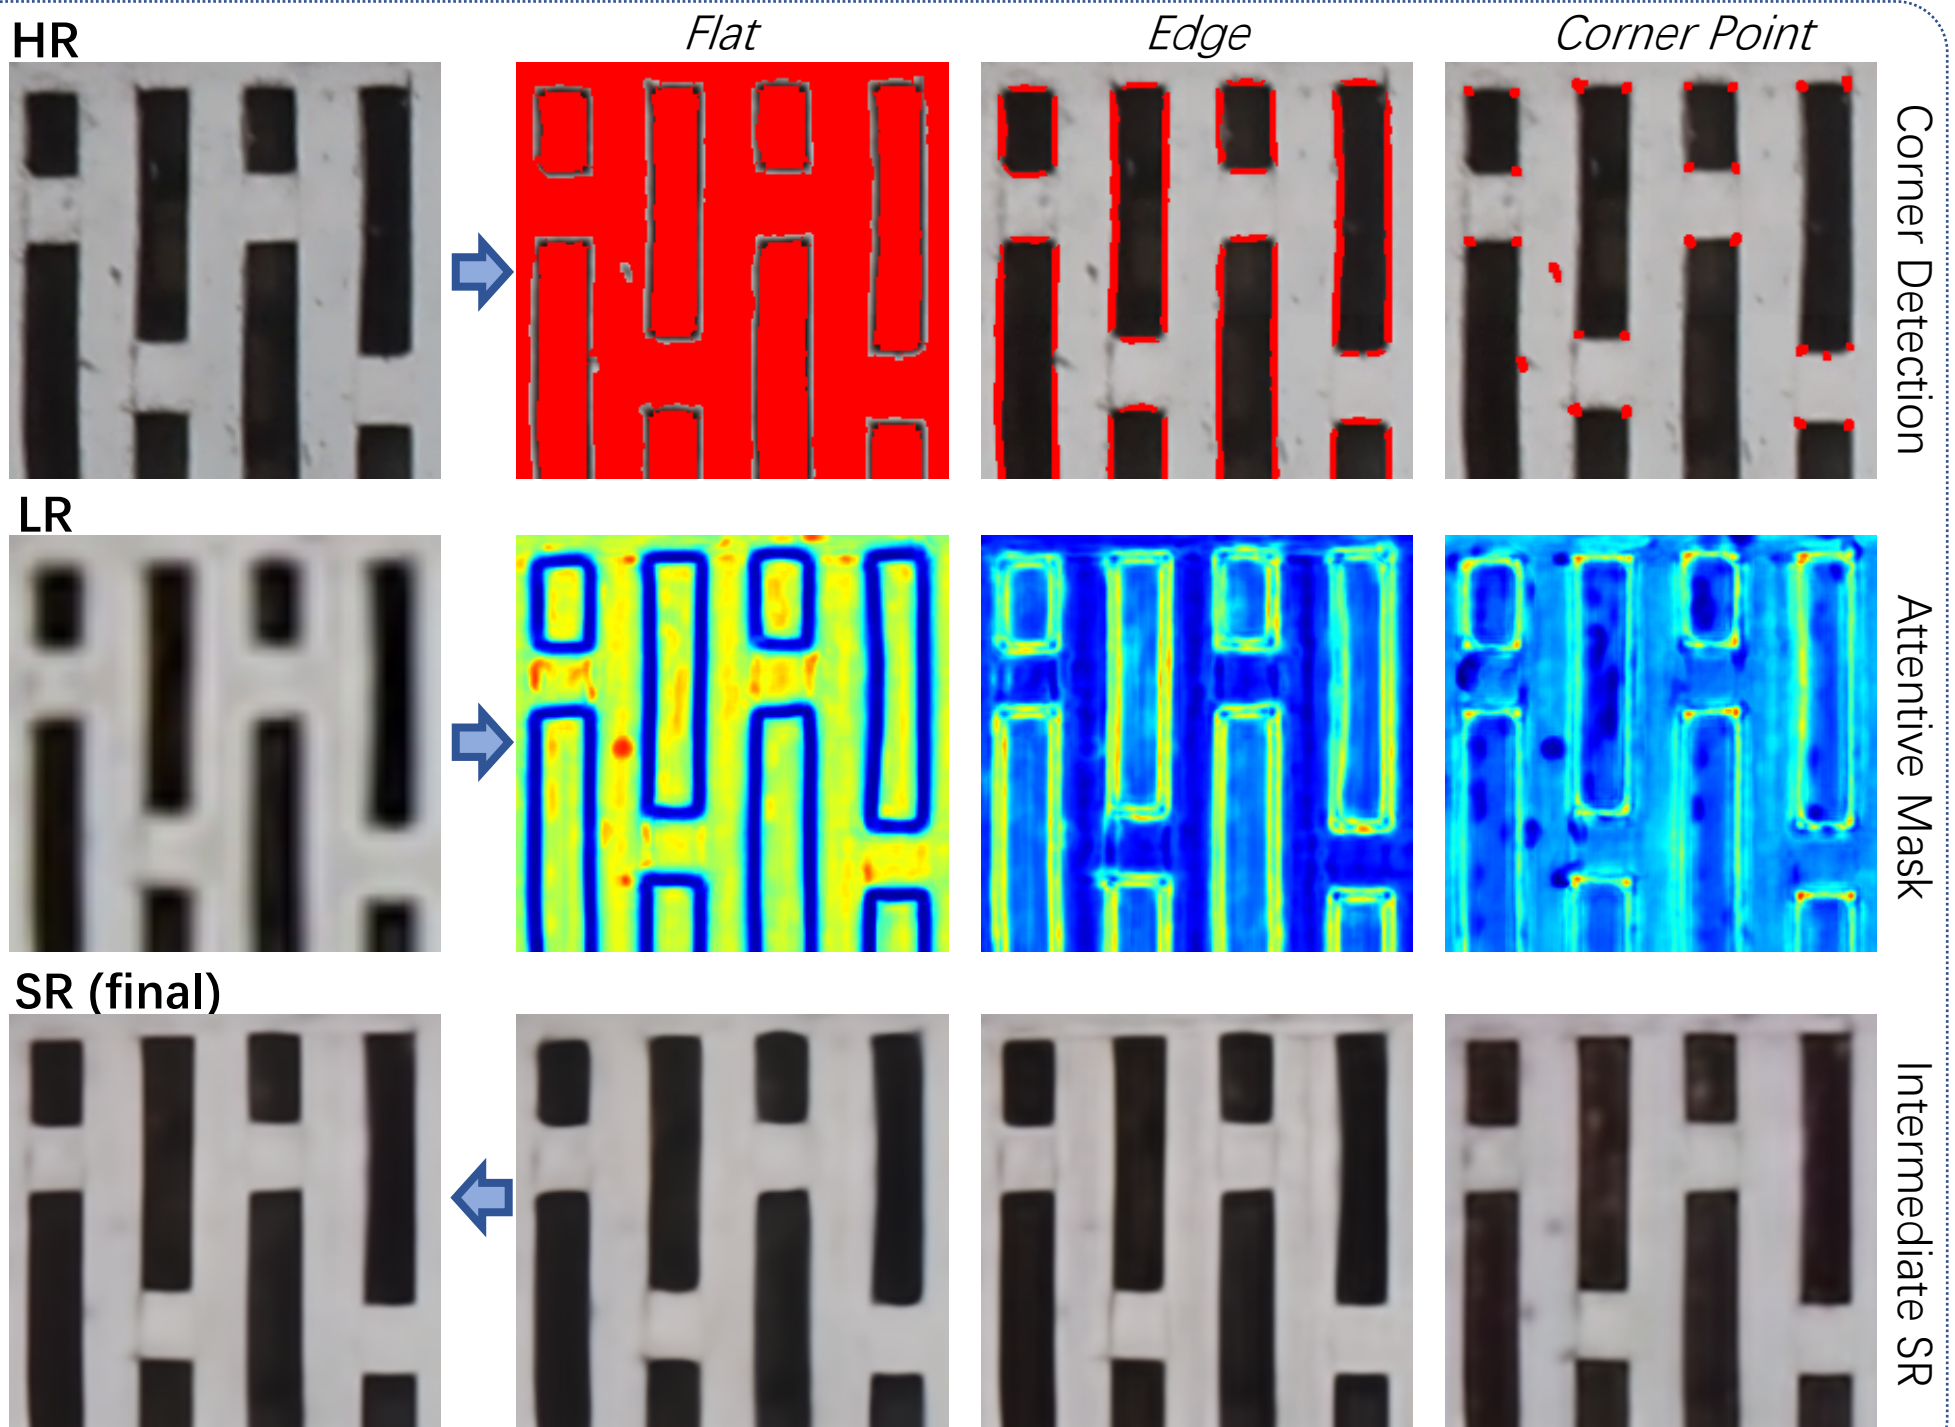

(b)

Supplement: Supplementary file 3 [file 123530103-supp.zip]

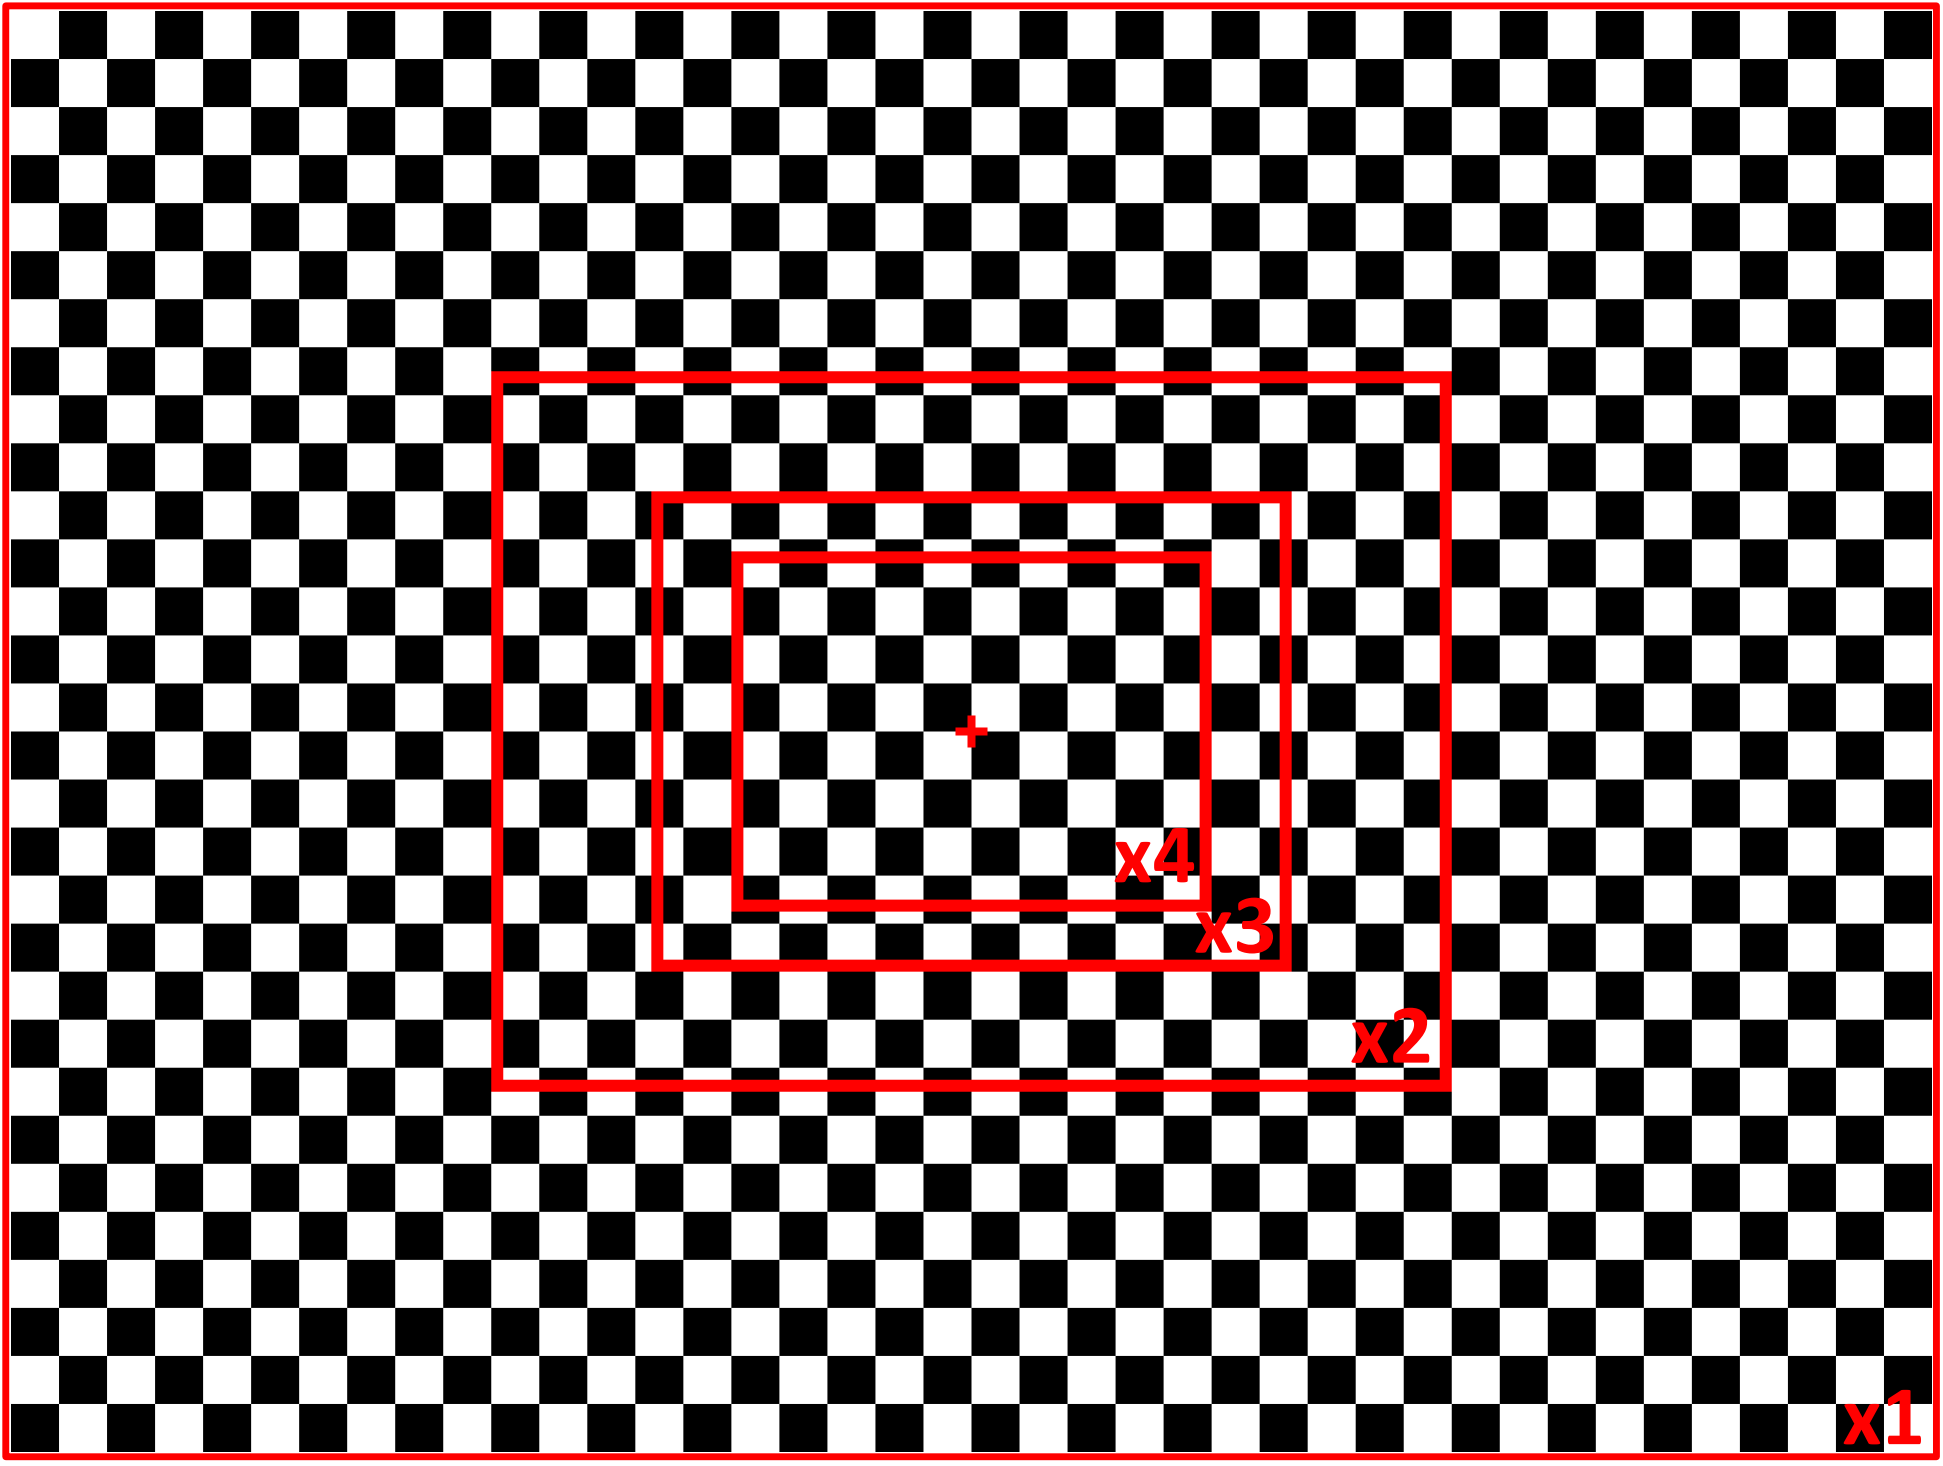

x1

x2

x3

x4

+

Supplement: Supplementary file 4 [file 123530103-supp.zip]
